# Supplementary material
Source: PubMed Central journal article supplement (PMC3872072)
Supplement: NIHMS489701-supplement-Supplementary_Material.pdf [file NIHMS489701-supplement-Supplementary_Material.pdf]

**Supplemental table 1** Buffering score of pH buffer supplements.

| <b>Supplement</b>                                | <b>Quantity<br/>(g or mL)</b> | <b>Water<br/>content (%)</b> | <b>Initial<br/>pH</b> | <b>mmoles HCl(+)<br/>or NaOH(-) to<br/>pH 4</b> | <b>mmoles<br/>HCl(+) or<br/>NaOH(-)/<br/>100g to pH 4</b> | <b>mmoles<br/>HCl(+) or<br/>NaOH(-)/<br/>100g dry wt<br/>to pH 4</b> |
|--------------------------------------------------|-------------------------------|------------------------------|-----------------------|-------------------------------------------------|-----------------------------------------------------------|----------------------------------------------------------------------|
| Spirulina                                        | 1g                            | 0                            | 8.1                   | 1.0                                             | 100.0                                                     | 100.0                                                                |
| NaHCO <sub>3</sub>                               | 1g                            | 0                            | 8.03                  | 11.0                                            | 1,100.0                                                   | 1,100.0                                                              |
| L-Lysine Free Base<br>(Sigma-Aldrich)            | 1g                            | 0                            | 9.52                  | 7.0                                             | 700.0                                                     | 700.0                                                                |
| L-Lysine (GNC)                                   | 1.52g                         | 0                            | 6.96                  | 1.0                                             | 65.8                                                      | 65.8                                                                 |
| Whey protein<br>(O,N.)                           | 10g                           | 0                            | 5.99                  | 6.0                                             | 60.0                                                      | 60.0                                                                 |
| L-Lysine<br>monohydrochloride<br>(Sigma-Aldrich) | 1g                            | 0                            | 6.99                  | 1.0                                             | 100.0                                                     | 100.0                                                                |
| CaCO <sub>3</sub> (TUMS)                         | 2.58g                         | 0                            | 7.7                   | 20.0                                            | 775.2                                                     | 775.2                                                                |
| Peptone (Sigma-<br>Aldrich)                      | 10g                           | 0                            | 6.49                  | 11.0                                            | 110.0                                                     | 110.0                                                                |

**Supplemental table 2** pH buffering score of foodstuffs.

| <b>Food/<br/>Food group</b> | <b>Quantity<br/>(g or mL)</b> | <b>Water<br/>content (%)</b> | <b>Initial<br/>pH</b> | <b>mmoles<br/>HCl(+)<br/>or<br/>NaOH(-)<br/>to pH 4</b> | <b>mmoles<br/>HCl(+)<br/>or<br/>NaOH(-)/<br/>100g to pH 4</b> | <b>mmoles<br/>HCl(+)<br/>or<br/>NaOH(-)/<br/>100g dry wt<br/>to pH 4</b> | <b>mmoles<br/>HCl(+)<br/>or<br/>NaOH(-)/<br/>serving size<br/>to pH 4</b> |
|-----------------------------|-------------------------------|------------------------------|-----------------------|---------------------------------------------------------|---------------------------------------------------------------|--------------------------------------------------------------------------|---------------------------------------------------------------------------|
| <b>Dairy</b>                |                               |                              |                       |                                                         |                                                               |                                                                          |                                                                           |
| <b>Products</b>             |                               |                              |                       |                                                         |                                                               |                                                                          |                                                                           |
| Sour cream                  | 50.8g                         | 80.60                        | 4.4                   | 1.0                                                     | 1.97                                                          | 10.15                                                                    | 0.3                                                                       |
| Peach yogurt                | 50g                           | 78.2                         | 4.5                   | 2.0                                                     | 4.0                                                           | 18.35                                                                    | 9.8                                                                       |
| Swiss cheese                | 100g                          | 43.67                        | 5.8                   | 33.3                                                    | 33.3                                                          | 59.12                                                                    | 9.4                                                                       |
| Whole milk                  | 100mL                         | 87.69                        | 6.63                  | 5.5                                                     | 5.5                                                           | 44.68                                                                    | 13.1                                                                      |
| Low fat milk                | 100mL                         | 89.92                        | 6.64                  | 8.0                                                     | 8.0                                                           | 79.37                                                                    | 18.9                                                                      |
| <b>Fruits</b>               |                               |                              |                       |                                                         |                                                               |                                                                          |                                                                           |
| Orange                      | 95g                           | 87.14                        | 3.96                  | 0.0                                                     | 0.0                                                           | 0.0                                                                      | 0.0                                                                       |
| Apple                       | 80g                           | 85.56                        | 3.85                  | -1.0                                                    | -1.25                                                         | -8.66                                                                    | -1.8                                                                      |
| Peach                       | 100g                          | 87.59                        | 3.98                  | 0.0                                                     | 0.0                                                           | 0.0                                                                      | 0.0                                                                       |
| Black Grapes                | 138g                          | 81.30                        | 3.97                  | -1.0                                                    | -0.72                                                         | -3.88                                                                    | -0.2                                                                      |
| Banana                      | 100g                          | 74.91                        | 4.78                  | 3.33                                                    | 3.33                                                          | 13.27                                                                    | 2.7                                                                       |
| Watermelon                  | 100mL                         | 91.45                        | 5.41                  | 3.0                                                     | 3.0                                                           | 35.09                                                                    | 4.56                                                                      |
| Cantaloupe                  | 100mL                         | 90.15                        | 6.71                  | 3.0                                                     | 3.0                                                           | 30.46                                                                    | 4.8                                                                       |
| <b>Vegetables</b>           |                               |                              |                       |                                                         |                                                               |                                                                          |                                                                           |
| Lettuce                     | 50g                           | 95.64                        | 6.23                  | 2.0                                                     | 4.0                                                           | 91.74                                                                    | 0.68                                                                      |
| Eggplant                    | 50g                           | 92.41                        | 5.60                  | 1.0                                                     | 2.0                                                           | 26.35                                                                    | 0.82                                                                      |
| Tomatoes                    | 50g                           | 94.50                        | 4.42                  | 1.0                                                     | 2.0                                                           | 36.36                                                                    | 1.24                                                                      |

|                                  |      |       |      |     |       |       |       |
|----------------------------------|------|-------|------|-----|-------|-------|-------|
| Green beans                      | 50g  | 90.32 | 6.88 | 2.0 | 4.0   | 41.32 | 2.0   |
| Kidney beans                     | 100g | 78.04 | 5.99 | 6.0 | 6.0   | 27.32 | 3.0   |
| Garbanzo<br>beans                | 100g | 69.69 | 6.24 | 4.0 | 4.0   | 13.2  | 2.0   |
| Carrots                          | 50g  | 90.35 | 6.33 | 2.0 | 4.0   | 41.45 | 2.56  |
| Brussel<br>sprouts               | 50g  | 86.00 | 6.7  | 3.0 | 6.0   | 42.86 | 2.64  |
| Beets                            | 50g  | 87.58 | 6.22 | 2.0 | 4.0   | 32.21 | 2.72  |
| Rice (white)                     | 50g  | 68.61 | 6.75 | 1.0 | 2.0   | 6.37  | 3.7   |
| Broccoli                         | 50g  | 89.30 | 6.97 | 3.0 | 6.0   | 56.07 | 2.73  |
| Asparagus                        | 50g  | 93.22 | 6.79 | 2.0 | 4.0   | 59.0  | 5.36  |
| <b>Eggs, Meats,<br/>Etc.</b>     |      |       |      |     |       |       |       |
| Eggs (whole)                     | 55g  | 75.84 | 7.31 | 6.0 | 10.91 | 45.15 | 6.0   |
| Chicken<br>breast                | 42g  | 64.90 | 6.05 | 5.0 | 11.9  | 33.92 | 14.88 |
| Tuna                             | 42g  | 59.83 | 5.92 | 6.0 | 14.29 | 35.56 | 23.57 |
| Hamburger<br>(fat)               | 42g  | 53.91 | 5.57 | 7.0 | 16.67 | 36.16 | 52.17 |
| Hamburger<br>(lean)              | 42g  | 58.16 | 5.38 | 3.0 | 7.14  | 17.07 | 22.35 |
| <b>Breads,<br/>cereals, etc.</b> |      |       |      |     |       |       |       |
| White bread                      | 55g  | 27.81 | 5.55 | 2.0 | 3.64  | 5.04  | 2.33  |
| Oatmeal                          | 50g  | 76.98 | 6.87 | 7.0 | 14.0  | 60.82 | 5.6   |
| Cheese pizza                     | 50g  | 44.16 | 5.53 | 6.0 | 12.0  | 21.49 | 14.04 |

**Beverages**

|                                          |       |       |      |      |       |         |       |
|------------------------------------------|-------|-------|------|------|-------|---------|-------|
| White wine                               | 100mL | 86.86 | 3.42 | -3.0 | -3.0  | -22.83  | -4.41 |
| Red wine                                 | 100mL | 86.49 | 3.62 | -1.0 | -1.0  | -7.40   | -1.47 |
| Caffeine-free<br>cola                    | 250mL | 89.62 | 2.82 | -2.0 | -0.8  | -7.71   | -2.95 |
| Apple juice                              | 100mL | 88.24 | 3.75 | -1.0 | -1.0  | -8.50   | -2.48 |
| Regular cola                             | 222mL | 90.31 | 2.98 | -1.0 | -0.45 | -4.65   | -1.66 |
| Regular<br>coffee                        | 10g   | 0.0   | 5.48 | 1.0  | 10.0  | 10.0    | 2.4   |
| Beer                                     | 207mL | 91.96 | 4.48 | 1.0  | 0.48  | 6.01    | 1.71  |
| Arizona fruit<br>punch                   | 250mL | 87.97 | 3.47 | -2.0 | -0.8  | -6.65   | -1.82 |
| Hawaiian<br>punch                        | 355mL | 87.97 | 3.11 | -4.0 | -1.13 | -9.37   | -2.57 |
| Diet cola                                | 150mL | 99.54 | 3.23 | -0.6 | -0.4  | -86.96  | -1.46 |
| Caffeine-free<br>and sugar-<br>free cola | 250mL | 99.74 | 3.60 | -1.0 | -.04  | -153.85 | -1.46 |
| V8 100%<br>vegetable<br>juice            | 200mL | 93.10 | 4.45 | 3.0  | 1.5   | 21.74   | 3.65  |

---
